# Supplementary material for: Pathogenicity in POLG syndromes: DNA polymerase gamma pathogenicity prediction server and database
Source: PubMed Central journal article supplement — BBA Clin. 2017 Apr 18;7:147–56. doi: 10.1016/j.bbacli.2017.04.001 (PMC5413197; doi:10.1016/j.bbacli.2017.04.001), 2017-04-18
Supplement: mmc1.pdf [file mmc1.pdf]

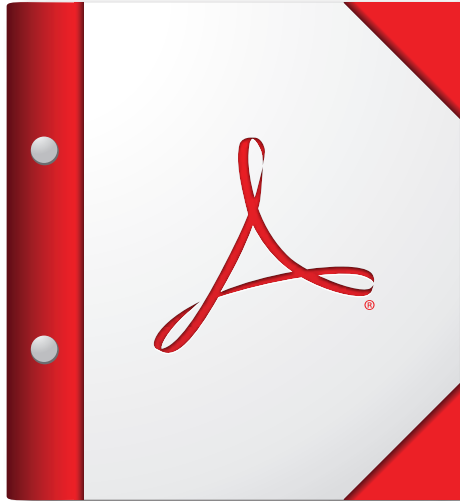

**For the best experience, open this PDF portfolio in  
Acrobat 9 or Adobe Reader 9, or later.**

[Get Adobe Reader Now!](#)
